# Supplementary material
Source: PubMed Central journal article supplement (PMC2877343)
Supplement: mmc1.pdf [file mmc1.pdf]

Biophysical Journal, Volume 98

**Supporting Material**

**IONIC MECHANISMS FOR ELECTRICAL HETEROGENEITY BETWEEN  
RABBIT PURKINJE AND VENTRICULAR CELLS**

Oleg V. Aslanidi, Rakan N. Sleiman, Mark R. Boyett, Jules C. Hancox, and Henggui Zhang

# Online Supplement

## IONIC MECHANISMS FOR ELECTRICAL HETEROGENEITY BETWEEN RABBIT PURKINJE FIBER AND VENTRICULAR CELLS

Oleg V. Aslanidi, Rakan N. Sleiman, Mark R. Boyett,  
Jules C. Hancox, Henggui Zhang

**TABLE S1: AP CHARACTERISTICS** (see Fig. 8)

| Property                     | Cell                          | Source                        | Symbol                  |                              |                   |
|------------------------------|-------------------------------|-------------------------------|-------------------------|------------------------------|-------------------|
| APD                          | PF                            | Lu <i>et al.</i> (2004)       | Square                  |                              |                   |
|                              |                               | Gluais <i>et al.</i> (2003)   | Circle                  |                              |                   |
|                              |                               | Gluais <i>et al.</i> (2002)   | Inverted triangle       |                              |                   |
|                              |                               | Ducroq <i>et al.</i> (2007)   | Hexagon                 |                              |                   |
| Noguchi <i>et al.</i> (2001) |                               | Triangle                      |                         |                              |                   |
| Endo                         | Verkerk <i>et al.</i> (2004)  | Verkerk <i>et al.</i> (2004)  | Triangle                |                              |                   |
|                              |                               | McIntosh <i>et al.</i> (2000) | Hexagon                 |                              |                   |
|                              |                               | Yan <i>et al.</i> (2001)      | Inverted triangle       |                              |                   |
|                              |                               | Idriss & Wolf (2004)          | Circle                  |                              |                   |
|                              |                               | Biagetti <i>et al.</i> (2006) | Diamond                 |                              |                   |
| M                            | McIntosh <i>et al.</i> (2000) | McIntosh <i>et al.</i> (2000) | Hexagon                 |                              |                   |
|                              |                               | Lu <i>et al.</i> (2001)       | diamond                 |                              |                   |
| Epi                          | Verkerk <i>et al.</i> (2004)  | Verkerk <i>et al.</i> (2004)  | Triangle                |                              |                   |
|                              |                               | McIntosh <i>et al.</i> (2000) | Hexagon                 |                              |                   |
|                              |                               | Yan <i>et al.</i> (2001)      | Inverted triangle       |                              |                   |
|                              |                               | Idriss & Wolf (2004)          | Circle                  |                              |                   |
|                              |                               | Biagetti <i>et al.</i> (2006) | diamond                 |                              |                   |
| dV/dt <sub>max</sub>         | PF                            | Lu <i>et al.</i> (2005)       | Hexagon                 |                              |                   |
|                              |                               | Gluais <i>et al.</i> (2003)   | Diamond                 |                              |                   |
|                              |                               | Gluais <i>et al.</i> (2002)   | Inverted triangle       |                              |                   |
|                              |                               | Ducroq <i>et al.</i> (2007)   | Square                  |                              |                   |
|                              |                               | Lu <i>et al.</i> (2002)       | Triangle                |                              |                   |
|                              |                               | Noguchi <i>et al.</i> 01      | Circle                  |                              |                   |
|                              |                               | Endo                          | Lu <i>et al.</i> (2005) | Lu <i>et al.</i> (2005)      | Hexagon           |
|                              |                               |                               |                         | Gluais <i>et al.</i> (2002)  | Inverted triangle |
|                              |                               |                               |                         | Noguchi <i>et al.</i> (2001) | Circle            |
|                              |                               |                               |                         | Golod <i>et al.</i> (1998)   | Square            |
| Gluais <i>et al.</i> (2003)  | Diamond                       |                               |                         |                              |                   |

|     |      |                                                                                                                                                                                 |                                                                         |
|-----|------|---------------------------------------------------------------------------------------------------------------------------------------------------------------------------------|-------------------------------------------------------------------------|
|     | M    | Lu <i>et al.</i> (2005)<br>Gluais <i>et al.</i> (2002)<br>Noguchi <i>et al.</i> (2001)<br>Golod <i>et al.</i> (1998)<br>Gluais <i>et al.</i> (2003)                             | Hexagon<br>Inverted triangle<br>Circle<br>Square<br>Diamond             |
|     | Epi  | Lu <i>et al.</i> (2005)<br>Gluais <i>et al.</i> (2002)<br>Noguchi <i>et al.</i> (2001)<br>Golod <i>et al.</i> (1998)<br>Gluais <i>et al.</i> (2003)                             | Hexagon<br>Inverted triangle<br>Circle<br>Square<br>Diamond             |
| APA | PF   | Lu <i>et al.</i> (2005)<br>Lu <i>et al.</i> (2002)<br>Gluais <i>et al.</i> (2002)<br>Noguchi <i>et al.</i> (2001)<br>Ducroq <i>et al.</i> (2007)<br>Gluais <i>et al.</i> (2003) | Square<br>Inverted triangle<br>Triangle<br>Diamond<br>Hexagon<br>Circle |
|     | Endo | Lu <i>et al.</i> (2005)<br>Noguchi <i>et al.</i> (2001)<br>Gluais <i>et al.</i> (2003)<br>Gluais <i>et al.</i> (2002)<br>McIntosh <i>et al.</i> (2000)                          | Square<br>Diamond<br>Circle<br>Triangle<br>Inverted triangle            |
|     | M    | Lu <i>et al.</i> (2005)<br>Noguchi <i>et al.</i> (2001)<br>Gluais <i>et al.</i> (2003)<br>Gluais <i>et al.</i> (2002)<br>McIntosh <i>et al.</i> (2000)                          | Square<br>Diamond<br>Circle<br>Triangle<br>Inverted triangle            |
|     | Epi  | Lu <i>et al.</i> (2005)<br>Noguchi <i>et al.</i> (2001)<br>Gluais <i>et al.</i> (2003)<br>Gluais <i>et al.</i> (2002)<br>McIntosh <i>et al.</i> (2000)                          | Square<br>Diamond<br>Circle<br>Triangle<br>Inverted triangle            |
| MDP | PF   | Gluais <i>et al.</i> (2003)<br>Lu <i>et al.</i> (2002)<br>Ducroq <i>et al.</i> (2007)<br>Noguchi <i>et al.</i> (2001)                                                           | Square<br>Diamond<br>Inverted triangle<br>Hexagon                       |
|     | Endo | Gluais <i>et al.</i> (2003)<br>Noguchi <i>et al.</i> (2001)<br>Fedida <i>et al.</i> (1991)<br>McIntosh <i>et al.</i> (2000)<br>Golod <i>et al.</i> (1998)                       | Square<br>Hexagon<br>Triangle<br>Diamond<br>Circle                      |
|     | M    | Gluais <i>et al.</i> (2003)                                                                                                                                                     | Square                                                                  |

|  |     |                                                                                                                                                           |                                                    |
|--|-----|-----------------------------------------------------------------------------------------------------------------------------------------------------------|----------------------------------------------------|
|  |     | Noguchi <i>et al.</i> (2001)<br>McIntosh <i>et al.</i> (2000)<br>Golod <i>et al.</i> (1998)                                                               | Hexagon<br>Diamond<br>Circle                       |
|  | Epi | Gluais <i>et al.</i> (2003)<br>Noguchi <i>et al.</i> (2001)<br>Fedida <i>et al.</i> (1991)<br>McIntosh <i>et al.</i> (2000)<br>Golod <i>et al.</i> (1998) | Square<br>Hexagon<br>Triangle<br>Diamond<br>Circle |

#### SUPPLEMENTAL REFERENCES (see Table S1)

M. O. Biagetti and R. A. Quintero. Gender differences in electrical re-modeling and susceptibility to ventricular arrhythmias in rabbits with left ventricular hypertrophy. *Heart Rhythm*, 3(7):832-9, 2006.

J. Ducroq, R. Printemps, S. Guilbot, J. Gardette, C. Salvetat, and M. Le Grand. Action potential experiments complete hERG assay and QT-interval measurements in cardiac preclinical studies. *J Pharmacol Toxicol Methods*, 56(2):159-70, 2007.

D. Fedida and W. R. Giles. Regional variations in action potentials and transient outward current in myocytes isolated from rabbit left ventricle. *J Physiol*, 442:191-209, 1991.

P. Gluais, M. Bastide, J. Caron, and M. Adamantidis. Risperidone prolongs cardiac action potential through reduction of K<sup>+</sup> currents in rabbit myocytes. *Eur J Pharmacol*, 444(3):123-32, 2002.

P. Gluais, M. Bastide, J. Caron, and M. Adamantidis. Comparative effects of clarithromycin on action potential and ionic currents from rabbit isolated atrial and ventricular myocytes. *J Cardiovasc Pharmacol*, 41(4):506-17, 2003.

D. A. Golod, R. Kumar, and R. W. Joyner. Determinants of action potential initiation in isolated rabbit atrial and ventricular myocytes. *Am J Physiol*, 274(6 Pt 2):H1902-13, 1998.

J. R. de Groot, T. Veenstra, A. O. Verkerk, R. Wilders, J. P. Smits, F. J. Wilms-Schopman, R. F. Wiegelerinck, J. Bourier, C. N. Belterman, R. Coronel, E. E. Verheijck. Conduction slowing by the gap junctional uncoupler carbenoxolone. *Cardiovasc Res*, 60:288-97, 2003.

S. F. Idriss and P. D. Wolf. Transmural action potential repolarization heterogeneity develops postnatally in the rabbit. *J Cardiovasc Electrophysiol*, 15(7):795-801, 2004.

H. R. Lu, R. Marien, A. Saels, and F. De Clerck. Are there sex-specific differences in ventricular repolarization or in drug-induced early afterdepolarizations in isolated rabbit Purkinje fibers? *J Cardiovasc Pharmacol*, 36(1):132-9, 2000.

H. R. Lu, E. Vlamincx, K. Van Ammel, and F. De Clerck. Drug-induced long QT in isolated rabbit Purkinje fibers: importance of action potential duration, triangulation and early afterdepolarizations. *Eur J Pharmacol*, 452(2):183-92, 2002.

H. R. Lu, E. Vlamincx, A. Van De Water, and D. J. Gallacher. Both beta-adrenergic receptor stimulation and cardiac tissue type have important roles in elucidating the functional effects of I(Ks) channel blockers in vitro. *J Pharmacol Toxicol Methods*, 51(2):81-90, 2005.

Z. Lu, K. Kamiya, T. Opthof, K. Yasui, and I. Kodama. Density and kinetics of  $I_{(Kr)}$  and  $I_{(Ks)}$  in guinea pig and rabbit ventricular myocytes explain different efficacy of  $I_{(Ks)}$  blockade at high heart rate in guinea pig and rabbit: implications for arrhythmogenesis in humans. *Circulation*, 104(8):951-6, 2001.

M. A. McIntosh, S. M. Cobbe, and G. L. Smith. Heterogeneous changes in action potential and intracellular  $Ca^{2+}$  in left ventricular myocyte sub-types from rabbits with heart failure. *Cardiovasc Res*, 45(2):397-409, 2000.

K. Noguchi, C. Ito, Y. Isobe, K. Fukushima, Y. Tanaka, H. Tanaka, and K. Shigenobu. Effects of 5-HT(4) receptor agonist prokinetic agents on the action potential parameters of isolated rabbit myocardium. *Pharmacology*, 62(2):73-9, 2001.

A. O. Verkerk, H. L. Tan, and J. H. Ravesloot.  $Ca^{2+}$ -activated  $Cl^-$  current reduces transmural electrical heterogeneity within the rabbit left ventricle. *Acta Physiol Scand*, 180(3):239-47, 2004.

R. T. Wiedmann, R. C. Tan, R. W. Joyner. Discontinuous conduction at Purkinje-ventricular muscle junction. *Am J Physiol*, 271:H1507-16, 1996.

G. X. Yan, S. J. Rials, Y. Wu, T. Liu, X. Xu, R. A. Marinchak, and P. R. Kowey. Ventricular hypertrophy amplifies transmural repolarization dispersion and induces early afterdepolarization. *Am J Physiol Heart Circ Physiol*, 281(5):H1968-75, 2001.

## APPENDIX S2: PF CELL MODEL

### General equations

$$\frac{dV}{dt} = -\frac{I_{ion}}{C_m}$$

$$I_{ion} = I_{Na} + I_{NaL} + I_{Ca,L} + I_{Ca,T} + I_{to} + I_{Kr} + I_{Ks} + I_{K1} + I_{Kp} + I_{NaCa} + I_{NaK} + I_{Na,b} + I_{Ca,b} + I_{K,b} + I_{Cl,b} + I_{SLCa,p}$$

### Fast $Na^+$ current

$$I_{Na} = g_{Na} m^3 h j (V - E_{Na})$$

$$\frac{dm}{dt} = \frac{m_{\infty} - m}{\tau_m}$$

$$m_{\infty} = \frac{\alpha_m}{\alpha_m + \beta_m}, \quad \tau_m = \frac{1.0}{\alpha_m + \beta_m}$$

$$\alpha_m = \frac{0.32(V + 47.13)}{1 - e^{-0.1(V + 47.13)}}, \quad \beta_m = 0.08e^{-V/11.0}$$

$$\frac{dh}{dt} = \frac{h_{\infty} - h}{\tau_h}, \quad \frac{dj}{dt} = \frac{j_{\infty} - j}{\tau_j}$$

$$h_{\infty} = \frac{\alpha_h}{\alpha_h + \beta_h}, \quad \tau_h = \frac{1.0}{\alpha_h + \beta_h}$$

$$j_{\infty} = \frac{\alpha_j}{\alpha_j + \beta_j}, \quad \tau_j = \frac{1.0}{\alpha_j + \beta_j}$$

If  $V \geq -40$  mV

$$\alpha_h = 0, \quad \beta_h = \frac{1.0}{0.13(1.0 + e^{-(V+10.66)/11.1})}$$

$$\alpha_j = 0, \quad \beta_j = \frac{0.3e^{(-2.535 \times 10^{-7} V)}}{1.0 + e^{-0.1(V+320)}}$$

Else

$$\alpha_h = 0.135e^{-(V+80)/6.8}, \quad \beta_h = 3.56e^{0.079V} + 3.1 \times 10^5 e^{0.35V}$$

$$\alpha_j = \frac{-1.2714 \times 10^5 e^{0.2444V} - 3.474 \times 10^{-5} e^{-0.0439V} (V + 37.78)}{1.0 + e^{0.311(V+79.23)}}$$

$$\beta_j = \frac{0.1212e^{-0.01053V}}{1.0 + e^{-0.1378(V+40.14)}}$$

### Late Na<sup>+</sup> current

$$I_{\text{NaL}} = g_{\text{NaL}} m_L h_L (V - E_{\text{Na}})$$

$$\frac{dm_L}{dt} = \frac{m_{L\infty} - m_L}{\tau_{mL}}$$

$$m_{L\infty} = \frac{\alpha_{mL}}{\alpha_{mL} + \beta_{mL}}, \quad \tau_{mL} = \frac{1.0}{\alpha_{mL} + \beta_{mL}}$$

$$\alpha_{m_i} = \frac{0.32(V + 47.13)}{1 - e^{-0.1(V+47.13)}}, \quad \beta_{m_i} = 0.08e^{-V/11.0}$$

$$\frac{dh_L}{dt} = \frac{h_{L\infty} - h_L}{\tau_{hL}}$$

$$h_{L\infty} = \frac{1.0}{1.0 + e^{((V+69)/6.1)}}$$

$$\tau_{hL} = 132.4 + 112.8e^{0.02323V}$$

### L-type Ca<sup>2+</sup> current

$$I_{\text{CaL}} = g_{\text{CaL}} df(1 - f_{\text{Ca}})(V - 60.0)$$

$$\frac{dd}{dt} = \frac{d_{\infty} - d}{\tau_d}$$

$$d_{\infty} = \frac{1.0}{1 + e^{-(V-4.0)/6.74}}, \quad \tau_d = \frac{0.59 + 0.8e^{0.52(V+13.0)}}{1 + e^{0.132(V+13.0)}}$$

$$\frac{df}{dt} = \frac{f_{\infty} - f}{\tau_f}$$

$$f_{\infty} = \frac{1.0}{1.0 + e^{(V+25.0)/10.0}}, \quad \tau_f = 0.005(V - 2.5)^{2.0} + 4.0$$

$$\frac{df_{Ca}}{dt} = 0.7[Ca^{2+}]_{jct}(1 - f_{Ca}) - 0.0119f_{Ca}$$

### T-type Ca<sup>2+</sup> current

$$I_{Ca,T} = g_{Ca,T}bg(V - 50.0)$$

$$\frac{db}{dt} = \frac{b_{\infty} - b}{\tau_b}$$

$$b_{\infty} = \frac{1.0}{1 + e^{-(V+28.0)/6.1}}, \quad \tau_b = \frac{1.0}{\alpha_b + \beta_b}$$

$$\alpha_b = 1.068e^{(V+16.3)/30.0}, \quad \beta_b = 1.068e^{-(V+16.3)/30.0}$$

$$\frac{dg}{dt} = \frac{g_{\infty} - g}{\tau_g}$$

$$g_{\infty} = \frac{1.0}{1.0 + e^{(V+60.0)/6.6}}, \quad \tau_{fT} = \frac{1.0}{\alpha_g + \beta_g}$$

$$\alpha_g = 0.015e^{-(V+71.7)/83.33}, \quad \beta_g = 0.015e^{(V+71.7)/15.38}$$

### Transient outward K<sup>+</sup> current

$$I_{to} = g_{to}r(0.75q_1 + 0.25q_2)(V - E_K)$$

$$\frac{dr}{dt} = \frac{r_{\infty} - r}{\tau_r}$$

$$r_{\infty} = \frac{\alpha_r}{\alpha_r + \beta_r}, \quad \tau_r = \frac{0.2}{\alpha_r + \beta_r}$$

$$\alpha_r = 0.0451e^{0.0304V}, \quad \beta_r = 0.0989e^{-0.053V}$$

$$\frac{dq_1}{dt} = \frac{q_{\infty} - q_1}{\tau_{q_1}}, \quad \frac{dq_2}{dt} = \frac{q_{\infty} - q_2}{\tau_{q_3}}$$

$$q_{\infty} = \frac{\alpha_q}{\alpha_q + \beta_q}, \quad \tau_{q_1} = 0.7 \left( 15 + \frac{20.0}{\alpha_q + \beta_q} \right), \quad \tau_{q_3} = \frac{4.0}{\alpha_q + \beta_q}$$

$$\alpha_q = \frac{0.05415e^{-(V+12.5)/15}}{1.0 + 0.0513e^{-(V+12.5)/15}}, \quad \beta_q = \frac{0.05415e^{(V+33.5)/15}}{1.0 + 0.0513e^{(V+33.5)/15}}$$

### Fast delayed rectifier K<sup>+</sup> current

$$I_{Kr} = g_{Kr}X_rR_{\infty}(V - E_K)$$

$$g_{Kr} = 0.0156\sqrt{[K^+]_0}/5.4$$

$$X_{r\infty} = \frac{1.0}{1.0 + e^{-(V+20.0)/10.5}}, \quad \tau_{Xr} = \frac{1.0(1 - e^{-0.123(V+7)})}{0.00138(V+7.0)} + \frac{0.00061(V+10.0)}{e^{0.145(V+10.0)} - 1.0}$$

$$\frac{dX_r}{dt} = \frac{X_{r\infty} - X_r}{\tau_{X_r}}$$

$$R_\infty = \frac{1.0}{1.0 + e^{V/50}}$$

### Slow delayed rectifier K<sup>+</sup> current

$$I_{Ks} = g_{Ks} X (V - E_{Ks})$$

$$g_{Ks} = 0.07 \left( 0.057 + \frac{0.19}{1.0 + e^{(-7.2 + p_{Ca})/0.6}} \right)$$

$$p_{Ca} = -1.0 \log_{10} ([Ca^{2+}]_i \times 10^{-3}) + 3.0$$

$$\frac{dX}{dt} = \frac{X_\infty - X}{\tau_X}$$

$$X_\infty = \frac{1.0}{1.0 + e^{-(V-1.5)/20.0}}, \quad \tau_X = \frac{600.0}{1 + e^{(V-20)/15}} + 250.0$$

### Inward rectifier K<sup>+</sup> current

$$I_{K1} = g_{K1} (K1_\infty + 0.008)(V - E_K)$$

$$g_{K1} = 0.5 \sqrt{([K^+]_o / 5.4)}$$

$$K1_\infty = \frac{\alpha_{K1}}{\alpha_{K1} + \beta_{K1}}$$

$$\alpha_{K1} = \frac{0.3}{1 + e^{(0.2383(V-E_K-59.215))}}$$

$$\beta_{K1} = \frac{0.49e^{(0.0803(V-E_K+5.5))} + e^{(0.06173(V-E_K-59.431))}}{1.0 + e^{(-0.5143(V-E_K+4.753))}}$$

### Plateau K<sup>+</sup> current

$$I_{Kp} = g_{Kp} I_{KpKp} (V - E_K)$$

$$I_{KpKp} = \frac{1.0}{1.0 + e^{(7.488-V)/5.98}}$$

### Ca<sup>2+</sup> activated Cl<sup>-</sup> current

$$I_{Cl} = \frac{0.3A_\infty I}{1.0 + 0.1/[Ca^{2+}]_i} (V - E_{Cl})$$

$$A_\infty = \frac{1.0}{1.0 + e^{-(V+5.0)/10.0}}$$

$$\frac{dI}{dt} = \frac{I_\infty - I}{\tau_I}$$



$$I_{\infty} = \frac{1.0}{1.0 + e^{(V+75.0)/10.0}}, \tau_I = \frac{20.0}{(1.0 + e^{(V+33.5)/10.0})} + 20.0$$

### Na<sup>+</sup>-Ca<sup>2+</sup> exchanger current

$$I_{\text{NaCa}} = \frac{1.8[\text{Na}^+]_i^3 [\text{Ca}^{2+}]_o e^{0.35VF/RT} - 1.5[\text{Na}^+]_o^3 [\text{Ca}^{2+}]_i e^{(0.35-1)VF/RT}}{\left(1.0 + (0.125/1.5[\text{Ca}^{2+}]_i)^2\right) \left(1.0 + 0.27e^{(0.35-1)VF/RT}\right) (d_{\text{NaCa}_1} + d_{\text{NaCa}_2})}$$

$$d_{\text{NaCa}_1} = K_{m\text{Ca}_o} [\text{Na}^+]_i^3 + K_{m\text{Na}_o}^3 1.5[\text{Ca}^{2+}]_i + K_{m\text{Na}_i}^3 [\text{Ca}^{2+}]_o (1.0 + 1.5[\text{Ca}^{2+}]_i / K_{m\text{Ca}_i})$$

$$d_{\text{NaCa}_2} = K_{m\text{Ca}_i} [\text{Na}^+]_o^3 (1 + ([\text{Na}^+]_i / K_{m\text{Na}_i})^3) + [\text{Na}^+]_i^3 [\text{Ca}^{2+}]_o + [\text{Na}^+]_o^3 1.5[\text{Ca}^{2+}]_i$$

### Na<sup>+</sup>-K<sup>+</sup> pump current

$$I_{\text{NaK}} = 0.6187 f_{\text{NaK}} \frac{[\text{K}^+]_o}{1 + (10.0/[\text{Na}^+]_i)^2 ([\text{K}^+]_o + 1.5)}$$

$$f_{\text{NaK}} = \frac{1.0}{1.0 + 0.1245e^{-0.1VF/RT}} + 0.0365\sigma e^{-0.1VF/RT}$$

$$\sigma = \frac{e^{[\text{Na}^+]_o/67.3} - 1}{7.0}$$

### Ca<sup>2+</sup> pump current

$$I_{\text{SLCa,p}} = \frac{0.033625}{1.0 + (0.5/[\text{Ca}^{2+}]_i)^{1.6}}$$

### Background currents

$$I_{\text{Na,b}} = g_{\text{Na,b}}(V - E_{\text{Na}}), \quad I_{\text{Ca,b}} = g_{\text{Ca,b}}(V - E_{\text{Ca}}), \quad I_{\text{K,b}} = g_{\text{K,b}}(V - E_{\text{K}}),$$

$$I_{\text{Cl,b}} = g_{\text{Cl,b}}(V - E_{\text{Cl}})$$

**TABLE S2. Model parameter values**

|                   |                                        |
|-------------------|----------------------------------------|
| $C_m$             | 66 pF                                  |
| $g_{\text{Na}}$   | $2 \times 10^{-2}$ $\mu\text{S/pF}$    |
| $g_{\text{NaL}}$  | $1.62 \times 10^{-5}$ $\mu\text{S/pF}$ |
| $g_{\text{Ca,L}}$ | $2.7 \times 10^{-4}$ $\mu\text{S/pF}$  |
| $g_{\text{Ca,T}}$ | $2.0 \times 10^{-4}$ $\mu\text{S/pF}$  |
| $g_{\text{to}}$   | $1.12 \times 10^{-4}$ $\mu\text{S/pF}$ |

|               |                                      |
|---------------|--------------------------------------|
| $g_{Kp}$      | $1 \times 10^{-6} \mu\text{S/pF}$    |
| $g_{Na,b}$    | $2.97 \times 10^{-8} \mu\text{S/pF}$ |
| $g_{Ca,b}$    | $3.52 \times 10^{-7} \mu\text{S/pF}$ |
| $g_{K,b}$     | $5 \times 10^{-8} \mu\text{S/pF}$    |
| $g_{Cl,b}$    | $2.7 \times 10^{-7} \mu\text{S/pF}$  |
| $K_{mCa_o}$   | 1.3 mM                               |
| $K_{mNa_o}$   | 87.5 mM                              |
| $K_{mNa_i}$   | 12.29 mM                             |
| $K_{mCa_i}$   | $3.59 \times 10^{-3} \mu\text{M}$    |
| $[Na^+]_o$    | 140.0 mM                             |
| $[Ca^{2+}]_o$ | 1.800 mM                             |
| $[K^+]_o$     | 5.400 mM                             |
| $[Cl^-]_o$    | 150 mM                               |
| $[Na^+]_i$    | 8.8 mM                               |
| $[Ca^{2+}]_i$ | 0.100 $\mu\text{M}$                  |
| $[K^+]_i$     | 135 mM                               |
| $[Cl^-]_i$    | 30 mM                                |
| $R$           | 8314 mJ/mol °C                       |
| $F$           | 96487 C/mol                          |
| $T$           | 35°C                                 |

## APPENDIX S3: VENTRICULAR CELL MODEL

### General equations

$$\frac{dV}{dt} = -\frac{I_{ion}}{C_m}$$

$$I_{ion} = I_{Na} + I_{Ca,L} + I_{to} + I_{Kr} + I_{Ks} + I_{K1} + I_{Kp} + I_{NaCa} + I_{NaK} + I_{Na,b} + I_{Ca,b} + I_{Cl,b} + I_{K,b} + I_{SLCa,p}$$

### Fast $Na^+$ current

$$I_{Na} = g_{Na} m^3 h j (V - E_{Na})$$

$$\frac{dm}{dt} = \frac{m_\infty - m}{\tau_m}$$

$$m_\infty = \frac{\alpha_m}{\alpha_m + \beta_m}, \quad \tau_m = \frac{1.0}{\alpha_m + \beta_m}$$

$$\alpha_m = \frac{0.32(V + 47.13)}{1 - e^{-0.1(V+47.13)}}, \quad \beta_m = 0.08e^{-V/11.0}$$

$$\frac{dh}{dt} = \frac{h_\infty - h}{\tau_h}, \quad \frac{dj}{dt} = \frac{j_\infty - j}{\tau_j}$$

$$h_\infty = \frac{\alpha_h}{\alpha_h + \beta_h}, \quad \tau_h = \frac{1.0}{\alpha_h + \beta_h}$$

$$j_\infty = \frac{\alpha_j}{\alpha_j + \beta_j}, \quad \tau_j = \frac{1.0}{\alpha_j + \beta_j}$$

If  $V \geq -40$  mV

$$\alpha_h = 0, \quad \beta_h = \frac{1.0}{0.13(1.0 + e^{-(V+10.66)/11.1})}$$

$$\alpha_j = 0, \quad \beta_j = \frac{0.3e^{(-2.535 \times 10^{-7} V)}}{1.0 + e^{-0.1(V+32.0)}}$$

Else

$$\alpha_h = 0.135e^{-(V+80)/6.8}, \quad \beta_h = 3.56e^{0.079V} + 3.1 \times 10^5 e^{0.35V}$$

$$\alpha_j = \frac{-1.2714 \times 10^5 e^{0.2444V} - 3.474 \times 10^{-5} e^{-0.0439V} (V + 37.78)}{1.0 + e^{0.311(V+79.23)}}$$

$$\beta_j = \frac{0.1212e^{-0.01053V}}{1.0 + e^{-0.1378(V+40.14)}}$$

### Late Na<sup>+</sup> current

$$I_{\text{NaL}} = g_{\text{NaL}} m_L h_L (V - E_{\text{Na}})$$

$$\frac{dm_L}{dt} = \frac{m_{L\infty} - m_L}{\tau_{mL}}$$

$$m_{L\infty} = \frac{\alpha_{mL}}{\alpha_{mL} + \beta_{mL}}, \quad \tau_{mL} = \frac{1.0}{\alpha_{mL} + \beta_{mL}}$$

$$\alpha_{m_i} = \frac{0.32(V + 47.13)}{1 - e^{-0.1(V+47.13)}}, \quad \beta_{m_i} = 0.08e^{-V/11.0}$$

$$\frac{dh_L}{dt} = \frac{h_{L\infty} - h_L}{\tau_{hL}}$$

$$h_{L\infty} = \frac{1.0}{1.0 + e^{((V+69)/6.1)}}$$

$$\tau_{h_L} = 132.4 + 112.8e^{0.02325V}$$

### L-type Ca<sup>2+</sup> current

$$I_{\text{CaL}} = g_{\text{CaL}} d(0.8f_1 + 0.2f_2)(1 - f_{\text{Ca}})(V - 60.0)$$

$$\frac{dd}{dt} = \frac{d_\infty - d}{\tau_d}$$

$$d_\infty = \frac{1.0}{1 + e^{-(V+8.5)/4.0}}, \quad \tau_d = 0.4 \left( \frac{1.0}{1.0 + e^{-(V+8.5)/4.0}} \right) \left( \frac{1 - e^{-(V+8.5)/4.0}}{0.035(V+8.5)} \right)$$

$$\frac{df_1}{dt} = \frac{f_\infty - f_1}{\tau_{f_1}}, \quad \frac{df_2}{dt} = \frac{f_\infty - f_2}{\tau_{f_2}}$$

$$f_\infty = \frac{1.0}{1.0 + e^{(V+28.06)/6.0}},$$

$$\tau_{f_1} = 8 + \frac{20.0}{1.0 + e^{-(V-20)/5}} - \frac{20.0}{1.0 + e^{-(V-40)/5}}, \quad \tau_{f_2} = 5 + \frac{30.0}{1.0 + e^{-(V-30)/5}} + 55.0$$

$$\frac{f_{Ca}}{dt} = 0.275[Ca^{2+}]_{jct}(1 - f_{Ca}) - 0.0029f_{Ca}$$

### Transient outward K<sup>+</sup> current

$$I_{to} = I_{tos} + I_{tof}$$

$$I_{tos} = g_{tos} X_{tos} (Y_{tos} + 0.5R_{s\infty})(V - E_K)$$

$$I_{tof} = g_{tof} X_{tof} Y_{tof} (V - E_K)$$

$$\frac{dX_{tos}}{dt} = \frac{X_{tos\infty} - X_{tos}}{\tau_{Xtos}}, \quad \frac{dY_{tos}}{dt} = \frac{Y_{tos\infty} - Y_{tos}}{\tau_{Ytos}}, \quad \frac{dX_{tof}}{dt} = \frac{X_{tof\infty} - X_{tof}}{\tau_{Xtof}}, \quad \frac{dY_{tof}}{dt} = \frac{Y_{tof\infty} - Y_{tof}}{\tau_{Ytof}}$$

$$X_{tos\infty} = \frac{1.0}{(1.0 + e^{-(V+3.0)/15})}, \quad \tau_{Xtos} = \frac{9.0}{1.0 + e^{-(V+3.0)/15}} + 0.5$$

$$Y_{tos\infty} = \frac{1.0}{(1.0 + e^{(V+33.5)/10})}, \quad \tau_{Ytos} = \frac{3000.0}{1.0 + e^{(V+60.0)/10}} + 30$$

$$X_{tof\infty} = \frac{1.0}{(1.0 + e^{-(V+3.0)/15})}, \quad \tau_{Xtof} = 3.5e^{-(V/30)^2} + 1.5$$

$$Y_{tof\infty} = \frac{1.0}{(1.0 + e^{(V+33.5)/10})}, \quad \tau_{Ytof} = \frac{20.0}{1.0 + e^{(V+33.5)/10}} + 20$$

$$R_{s\infty} = \frac{1.0}{(1.0 + e^{(V+33.5)/10})}$$

### Fast delayed rectifier K<sup>+</sup> current

$$I_{Kr} = g_{Kr} X_r R_\infty (V - E_K)$$

$$g_{Kr} = 0.03\sqrt{[K^+]_0/5.4}$$

$$X_{r\infty} = \frac{1.0}{1.0 + e^{-(V+50.0-35)/7.5}}, \quad \tau_{Xr} = \frac{1.0(1 - e^{-0.123(V+7-35)})}{0.00138(V+7.0-35)} + \frac{0.00061(V+10.0-35)}{e^{0.145(V+10.0-35)} - 1.0}$$

$$\frac{dX_r}{dt} = \frac{X_{r\infty} - X_r}{\tau_{Xr}}$$

$$R_{\infty} = \frac{1.0}{1.0 + 6.0 e^{0.05V}}$$

### Slow delayed rectifier $K^+$ current

$$I_{Ks} = g_{ks} g_{Ks,SL} X^2 (V - E_K)$$

$$g_{Ks,SL} = 0.14 \left( 0.057 + \frac{0.19}{1.0 + e^{(-7.2 + p_{Ca})/0.6}} \right)$$

$$p_{Ca} = -1.0 \log_{10} ([Ca^{2+}]_i \times 10^{-3}) + 3.0$$

$$\frac{dX}{dt} = \frac{X_{\infty} - X}{\tau_X}$$

$$X_{\infty} = \frac{1.0}{1.0 + e^{-(V-1.5)/13.0}}, \quad \tau_X = \frac{300.0}{1.0 + e^{(V-20)/15.0}} + 125.0$$

### Inward rectifier $K^+$ current

$$I_{K1} = g_{K1} K1_{\infty} (V - E_K)$$

$$K1_{\infty} = \frac{\alpha_{K1}}{\alpha_{K1} + \beta_{K1}}$$

$$\alpha_{K1} = \frac{1.02}{1 + e^{(0.238(V - E_K - 59.215 - 5))}}$$

$$\beta_{K1} = \frac{0.49 e^{(0.080(V - E_K + 5.5 - 5))} + e^{(0.0617(V - E_K - 59.431 - 5))}}{1.0 + e^{(-0.514(V - E_K + 4.753 - 5))}}$$

### Plateau $K^+$ current

$$I_{Kp} = g_{Kp} I_{Kp,Kp} (V - E_K)$$

$$I_{Kp,Kp} = \frac{1.0}{1.0 + e^{(7.488 - V)/5.98}}$$

### $Ca^{2+}$ activation $Cl^-$ Current

$$I_{Cl} = \frac{g_{Cl} A_{\infty} I}{1.0 + 0.1/[Ca^{2+}]_i} (V - E_{Cl})$$

$$A_{\infty} = \frac{1.0}{1.0 + e^{-(V+5.0)/10.0}}$$

$$\frac{dI}{dt} = \frac{I_{\infty} - I}{\tau_I}$$

$$I_{\infty} = \frac{1.0}{1.0 + e^{(V+75.0)/10.0}}, \quad \tau_I = \left( \frac{10.0}{1.0 + e^{(V+33.5)/10.0}} \right) + 10.0$$

### Na<sup>+</sup>-Ca<sup>2+</sup> exchanger current

$$I_{NaCa} = \frac{A - [Na^+]_o^3 [Ca^{2+}]_i e^{(0.35-1)VF/RT}}{(1.0 + 0.27e^{(0.35-1)VF/RT})(d_{NaCa_1} + d_{NaCa_2})}$$

$$A = 9.0 \left( ([Na^+]_i^3 [Ca^{2+}]_o e^{0.35VF/RT}) \right) \frac{1.0}{1.0 + (0.256/[Ca^{2+}]_i)^3}$$

$$d_{NaCa_1} = K_{mCa_o} [Na^+]_i^3 + K_{mNa_o}^3 [Ca^{2+}]_i + K_{mNa_i}^3 [Ca^{2+}]_o (1.0 + [Ca^{2+}]_i / K_{mCa_i})$$

$$d_{NaCa_2} = K_{mCa_i} [Na^+]_o^3 (1 + ([Na^+]_i / K_{mNa_i})^3) + [Na^+]_i^3 [Ca^{2+}]_o + [Na^+]_o^3 [Ca^{2+}]_i$$

### Na<sup>+</sup>-K<sup>+</sup> pump current

$$I_{NaK} = 1.907 f_{NaK} \frac{[K^+]_o}{1 + (11.0/[Na^+]_i)^4} ([K^+]_o + 1.5)$$

$$f_{NaK} = \frac{1.0}{1.0 + 0.1245e^{-0.1VF/RT}} + 0.0365\sigma e^{-0.1VF/RT}$$

$$\sigma = \frac{e^{[Na^+]_o/67.3} - 1}{7.0}$$

### Ca<sup>2+</sup> pump current

$$I_{SLCa,p} = \frac{0.067}{1.0 + (0.5/[Ca^{2+}]_i)^{1.6}}$$

### Background currents

$$I_{Na,b} = g_{Na,b}(V - E_{Na}), \quad I_{Ca,b} = g_{Ca,b}(V - E_{Ca}), \quad I_{Cl,b} = g_{Cl,b}(V - E_{Cl})$$

**TABLE S3. Model parameter values**

|            | Endo                                 | M                                    | Epi                                  |
|------------|--------------------------------------|--------------------------------------|--------------------------------------|
| $C_m$      | 88 pF                                | 88 pF                                | 88 pF                                |
| $g_{Na}$   | $8.0 \times 10^{-3} \mu\text{S/pF}$  | $8.0 \times 10^{-3} \mu\text{S/pF}$  | $8.0 \times 10^{-3} \mu\text{S/pF}$  |
| $g_{NaL}$  | $1.62 \times 10^{-6} \mu\text{S/pF}$ | $1.62 \times 10^{-6} \mu\text{S/pF}$ | $1.62 \times 10^{-6} \mu\text{S/pF}$ |
| $g_{Ks}$   | 1.0                                  | 0.7                                  | 1.5                                  |
| $g_{tos}$  | $1.7 \times 10^{-5} \mu\text{S/pF}$  | $8.5 \times 10^{-6} \mu\text{S/pF}$  | $3.12 \times 10^{-5} \mu\text{S/pF}$ |
| $g_{tof}$  | $9 \times 10^{-5} \mu\text{S/pF}$    | $5.1 \times 10^{-5} \mu\text{S/pF}$  | $1.17 \times 10^{-4} \mu\text{S/pF}$ |
| $g_{Ca,L}$ | $4.0 \times 10^{-4} \mu\text{S/pF}$  | $4.4 \times 10^{-4} \mu\text{S/pF}$  | $4.0 \times 10^{-4} \mu\text{S/pF}$  |
| $g_{Kl}$   | $4.5 \times 10^{-4} \mu\text{S/pF}$  | $4.2 \times 10^{-4} \mu\text{S/pF}$  | $5.4 \times 10^{-4} \mu\text{S/pF}$  |

|                      |                                       |                                       |                                       |
|----------------------|---------------------------------------|---------------------------------------|---------------------------------------|
| $g_{Kp}$             | $1 \times 10^{-6} \mu\text{S/pF}$     | $1 \times 10^{-6} \mu\text{S/pF}$     | $1 \times 10^{-6} \mu\text{S/pF}$     |
| $g_{Cl}$             | $1 \times 10^{-4} \mu\text{S/pF}$     | $1 \times 10^{-4} \mu\text{S/pF}$     | $1 \times 10^{-4} \mu\text{S/pF}$     |
| $g_{Na,b}$           | $1.49 \times 10^{-6} \mu\text{S/pF}$  | $1.49 \times 10^{-6} \mu\text{S/pF}$  | $1.49 \times 10^{-6} \mu\text{S/pF}$  |
| $g_{Ca,b}$           | $2.513 \times 10^{-7} \mu\text{S/pF}$ | $2.513 \times 10^{-7} \mu\text{S/pF}$ | $2.513 \times 10^{-7} \mu\text{S/pF}$ |
| $g_{K,b}$            | $0.0 \times 10^{-3} \mu\text{S/pF}$   | $0.0 \times 10^{-3} \mu\text{S/pF}$   | $0.0 \times 10^{-3} \mu\text{S/pF}$   |
| $g_{Cl,b}$           | $6.75 \times 10^{-6} \mu\text{S/pF}$  | $2.25 \times 10^{-6} \mu\text{S/pF}$  | $7.2 \times 10^{-6} \mu\text{S/pF}$   |
| $K_{mCa0}$           | 1.3 mM                                | 1.3 mM                                | 1.3 mM                                |
| $K_{mNa0}$           | 87.5 mM                               | 87.5 mM                               | 87.5 mM                               |
| $K_{mNa_i}$          | 12.29 mM                              | 12.29 mM                              | 12.29 mM                              |
| $K_{mCa_i}$          | $3.59 \times 10^{-3} \mu\text{M}$     | $3.59 \times 10^{-3} \mu\text{M}$     | $3.59 \times 10^{-3} \mu\text{M}$     |
| $[\text{Na}^+]_o$    | 140.0 mM                              | 140.0 mM                              | 140.0 mM                              |
| $[\text{Ca}^{2+}]_o$ | 1.800 mM                              | 1.800 mM                              | 1.800 mM                              |
| $[\text{K}^+]_o$     | 5.400 mM                              | 5.400 mM                              | 5.400 mM                              |
| $[\text{Cl}^-]_o$    | 150 mM                                | 150 mM                                | 150 mM                                |
| $[\text{Na}^+]_i$    | 8.8 mM                                | 8.8 mM                                | 8.8 mM                                |
| $[\text{Ca}^{2+}]_i$ | 0.100 $\mu\text{M}$                   | 0.100 $\mu\text{M}$                   | 0.100 $\mu\text{M}$                   |
| $[\text{K}^+]_i$     | 135 mM                                | 135 mM                                | 135 mM                                |
| $[\text{Cl}^-]_i$    | 30 mM                                 | 30 mM                                 | 30 mM                                 |
| $R$                  | 8314 mJ/mol °C                        | 8314 mJ/mol °C                        | 8314 mJ/mol °C                        |
| $F$                  | 96487 C/mol                           | 96487 C/mol                           | 96487 C/mol                           |
| $T$                  | 35°C                                  | 35°C                                  | 35°C                                  |

## APPENDIX S4: $\text{Ca}^{2+}$ HANDLING

### Intracellular $\text{Ca}^{2+}$ handling

$$\frac{d[\text{Ca}^{2+}]_i}{dt} = -\frac{\text{Vol}_{\text{SR}}}{\text{Vol}_{\text{cyt}}} J_{\text{pump,SR}} + \frac{J_{\text{Ca,SL-cyt}}}{\text{Vol}_{\text{cyt}}} - d\text{Ca}_{\text{cyt,bound}}$$

In PF cells

$$\frac{d[\text{Ca}^{2+}]_{\text{SL}}}{dt} = -0.5 \frac{I_{\text{Ca,b}} + I_{\text{Ca,p}} - 2I_{\text{NaCa}}}{2\text{Vol}_{\text{SL}} F} + \frac{J_{\text{Ca,jct-SL}} - J_{\text{Ca,SL-cyt}}}{\text{Vol}_{\text{SL}}} - d\text{Ca}_{\text{SL,bound}}$$

$$\frac{d[\text{Ca}^{2+}]_{\text{jct}}}{dt} = -0.5 \frac{I_{\text{Ca,L}} + I_{\text{Ca,T}}}{2\text{Vol}_{\text{jct}} F} + \frac{\text{Vol}_{\text{SL}}}{\text{Vol}_{\text{jct}}} J_{\text{rel,SR}} + \frac{\text{Vol}_{\text{cyt}}}{\text{Vol}_{\text{jct}}} J_{\text{leak,SR}} - \frac{J_{\text{Ca,jct-SL}}}{\text{Vol}_{\text{jct}}} - d\text{Ca}_{\text{jct,bound}}$$

In ventricular cells

$$\begin{aligned}\frac{d[Ca^{2+}]_{SL}}{dt} &= -0.65 \frac{I_{Ca,b} + I_{Ca,p} - 2I_{NaCa}}{2Vol_{SL}F} + \frac{J_{Ca,jct-SL} - J_{Ca,SL-cyt}}{Vol_{SL}} - dCa_{SL,bound} \\ \frac{d[Ca^{2+}]_{jct}}{dt} &= -0.65 \frac{I_{Ca,L} + I_{Ca,T}}{2Vol_{jct}F} + \frac{Vol_{SL}}{Vol_{jct}} J_{rel,SR} + \frac{Vol_{cyt}}{Vol_{jct}} J_{leak,SR} - \frac{J_{Ca,jct-SL}}{Vol_{jct}} - dCa_{jct,bound} \\ \frac{d[Ca^{2+}]_{SR}}{dt} &= J_{pump,SR} - \left( J_{rel,SR} + \frac{Vol_{cyt}}{Vol_{SR}} J_{leak,SR} \right) - dCa_{CQSN} \\ J_{Ca,jct-SL} &= 0.8241([Ca^{2+}]_{jct} - [Ca^{2+}]_{SL}), \quad J_{Ca,SL-cyt} = 3.7243([Ca^{2+}]_{SL} - [Ca^{2+}]_i)\end{aligned}$$

In PF cells

$$\begin{aligned}J_{pump,SR} &= 2.0V_{max} \frac{Vol_{cyt}}{Vol_{SR}} \frac{([Ca^{2+}]_i/K_{m,f})^H - ([Ca^{2+}]_{SR}/K_{m,r})^H}{1.0 + ([Ca^{2+}]_i/K_{m,f})^H + ([Ca^{2+}]_{SR}/K_{m,r})^H} \\ J_{rel,SR} &= 2.0k_s O([Ca^{2+}]_{SR} - [Ca^{2+}]_{jct}), \quad J_{leak,SR} = 0.5k_{leak,SR} ([Ca^{2+}]_{SR} - [Ca^{2+}]_{jct})\end{aligned}$$

In ventricular cells

$$\begin{aligned}J_{pump,SR} &= V_{max} \frac{Vol_{cyt}}{Vol_{SR}} \frac{([Ca^{2+}]_i/K_{m,f})^H - ([Ca^{2+}]_{SR}/K_{m,r})^H}{1.0 + ([Ca^{2+}]_i/K_{m,f})^H + ([Ca^{2+}]_{SR}/K_{m,r})^H} \\ J_{rel,SR} &= k_s O([Ca^{2+}]_{SR} - [Ca^{2+}]_{jct}), \quad J_{leak,SR} = k_{leak,SR} ([Ca^{2+}]_{SR} - [Ca^{2+}]_{jct})\end{aligned}$$

$$k_{Ca-SR} = Max_{SR} - \frac{Max_{SR} - Min_{SR}}{1.0 + (EC_{50-SR}/[Ca^{2+}]_{SR})^{2.5}}, \quad k_{o,Ca-SR} = \frac{k_{o,Ca}}{k_{Ca-SR}}, \quad k_{i,Ca-SR} = k_{i,Ca} k_{Ca-SR}$$

$$\frac{dR}{dt} = (k_{i,m}RI - k_{i,Ca-SR}[Ca^{2+}]_{jct}R) - (k_{o,Ca-SR}[Ca^{2+}]_{jct}^2R - k_{o,m}O)$$

$$\frac{dO}{dt} = (k_{o,Ca-SR}[Ca^{2+}]_{jct}^2R - k_{o,m}O) - (k_{i,Ca-SR}[Ca^{2+}]_{jct}O - k_{i,m}I)$$

$$\frac{dI}{dt} = (k_{i,Ca-SR}[Ca^{2+}]_{jct}O - k_{i,m}I) - (k_{o,m}I - k_{o,Ca-SR}[Ca^{2+}]_{jct}^2RI)$$

$$\frac{dRI}{dt} = (k_{o,m}I - k_{o,Ca-SR}[Ca^{2+}]_{jct}^2RI) - (k_{i,m}RI - k_{i,Ca-SR}[Ca^{2+}]_{jct}R)$$

### Intracellular Ca<sup>2+</sup> buffering

$$dCa_{cyt,bound} = dCa_{TRPN} + dCa_{TRPN,Ca-Mg} + dMg_{TRPN,Ca-Mg} + dCa_{CMDN} + dCa_{MSN} + dCa_{SR-B}$$

$$dCa_{jct,bound} = dCa_{jct,SL-B} + dCa_{jct,SL-H}, \quad dCa_{SL,bound} = dCa_{SL,SL-B} + dCa_{SL,SL-H}$$

$$dCa_{TRPN} = 32,700.0[Ca^{2+}]_i(0.07 - [Ca^{2+}]_{TRPN}) - 19.6[Ca^{2+}]_{TRPN}$$

$$dCa_{TRPN,Ca-Mg} = 2,3700.0[Ca^{2+}]_i(0.14 - S_{TRPN,Ca-Mg}) - 0.032[Ca^{2+}]_{TRPN,Ca-Mg}$$



$$dMg_{TRPN,Ca-Mg} = 3.0[Mg^{2+}]_i(0.14 - S_{TRPN,Ca-Mg}) - 3.33[Mg^{2+}]_{TRPN,Ca-Mg}$$

$$S_{TRPN,Ca-Mg} = [Ca^{2+}]_{TRPN,Ca-Mg} + [Mg^{2+}]_{TRPN,Ca-Mg}$$

$$dCa_{CMDN} = 34,000.0[Ca^{2+}]_i(0.024 - [Ca^{2+}]_{CMDN}) - 238.0[Ca^{2+}]_{CMDN}$$

$$dCa_{MSN} = 13,800.0[Ca^{2+}]_i(0.14 - [Ca^{2+}]_{MSN}) - 0.46[Ca^{2+}]_{MSN}$$

$$dCa_{SR-B} = 100,000.0[Ca^{2+}]_i(0.0171 - [Ca^{2+}]_{SR-B}) - 60.0[Ca^{2+}]_{SR-B}$$

$$dCa_{jct,SL-B} = 100,000.0[Ca^{2+}]_{jct} \left( \frac{Vol_{cyt}}{Vol_{jct}} 0.0046 - [Ca^{2+}]_{jct,SL-B} \right) - 1,300.0[Ca^{2+}]_{jct,SL-B}$$

$$dCa_{jct,SL-H} = 100,000.0[Ca^{2+}]_{jct} \left( \frac{Vol_{cyt}}{Vol_{jct}} 0.00165 - [Ca^{2+}]_{jct,SL-H} \right) - 30,000.0[Ca^{2+}]_{jct,SL-H}$$

$$dCa_{SL,SL-B} = 100,000.0[Ca^{2+}]_{SL} \left( \frac{Vol_{cyt}}{Vol_{SL}} 0.0374 - [Ca^{2+}]_{SL,SL-B} \right) - 1,300.0[Ca^{2+}]_{SL,SL-B}$$

$$dCa_{jct,SL-H} = 100,000.0[Ca^{2+}]_{SL} \left( \frac{Vol_{cyt}}{Vol_{SL}} 0.00165 - [Ca^{2+}]_{SL,SL-H} \right) - 30,000.0[Ca^{2+}]_{SL,SL-H}$$

$$dCa_{CQSN} = 100,000.0[Ca^{2+}]_{SR} \left( \frac{Vol_{cyt}}{Vol_{SR}} 0.14 - [Ca^{2+}]_{CQSN} \right) - 65,000.0[Ca^{2+}]_{CQSN}$$

$$\frac{d[Ca^{2+}]_X}{dt} = dCa_X, \quad \frac{d[Mg^{2+}]_{TRPN,Ca-Mg}}{dt} = dMg_{TRPN,Ca-Mg}$$

**TABLE S4: Model parameter values**

|               |                           |
|---------------|---------------------------|
| $Vol_{cell}$  | 33 pL                     |
| $Vol_{cyt}$   | 21.45 pL                  |
| $Vol_{SR}$    | 1.155 pL                  |
| $Vol_{SL}$    | 0.66 pL                   |
| $Vol_{jct}$   | 0.016 pL                  |
| $[Mg^{2+}]_i$ | 1.000 mM                  |
| $V_{max}$     | 2.860 mM s <sup>-1</sup>  |
| $K_{m,f}$     | 0.000246 mM               |
| $K_{m,r}$     | 1.700 mM                  |
| $H$           | 1.787                     |
| $k_s$         | 125,000.0 s <sup>-1</sup> |
| $k_{leak,SR}$ | 0.005348 s <sup>-1</sup>  |
| $Max_{SR}$    | 15.00                     |
| $Min_{SR}$    | 1.000                     |

|              |                                           |
|--------------|-------------------------------------------|
| $EC_{50-SR}$ | 0.450 mM                                  |
| $k_{o,Ca}$   | 10,000.0 mM <sup>-2</sup> s <sup>-1</sup> |
| $k_{i,Ca}$   | 500.0 mM s <sup>-1</sup>                  |
| $k_{o,m}$    | 60.00 s <sup>-1</sup>                     |
| $k_{i,m}$    | 5.000 s <sup>-1</sup>                     |

## SUPPLEMENTARY FIGURE LEGENDS

**Figure S1.** Simulated effects of 50% (light grey bars) and 100% (dark grey bars) block of  $I_{Ca,L}$  on the APD in PF, Endo, M and Epi cell models. Black bars indicate control values. A: APD at (i) 500 ms, (ii) 1000 ms, (iii) 2000 ms basic cycle length. B: absolute changes in APD from control due to the block. C: percentage changes in APD from control.

**Figure S2.** Simulated effects of 50% (light grey) and 100% (dark grey) block of  $I_{NaL}$  on APD in PF, Endo, M and Epi cell models. Black bars indicate control values. A: APD at (i) 500 ms, (ii) 1000 ms, (iii) 2000 ms basic cycle length. B: absolute changes in APD from control due to the block. C: percentage changes in APD from control.

**Figure S3.** Simulated effects of 50% (light grey) and 100% (dark grey) block of  $I_{to}$  on APD in PF, Endo, M and Epi cell models. Black bars indicate control values. A: APD at (i) 500 ms, (ii) 1000 ms, (iii) 2000 ms basic cycle length. B: absolute changes in APD from control due to the block. C: percentage changes in APD from control.

**Figure S4.** Simulated effects of 50% (light grey) and 100% (dark grey) block of  $I_{Kr}$  on APD in PF, Endo, M and Epi cell models. Black bars indicate control values. A: APD at (i) 500 ms, (ii) 1000 ms, (iii) 2000 ms basic cycle length. B: absolute changes in APD from control due to the block. C: percentage changes in APD from control. Symbols represent experimental values.

**Figure S5.** Simulated effects of 50% (light grey) and 100% (dark grey) block of  $I_{Ks}$  on APD in PF, Endo, M and Epi cell models. Black bars indicate control values. A: APD at (i) 500 ms, (ii) 1000 ms, (iii) 2000 ms basic cycle length. B: absolute changes in APD from control due to the block. C: percentage changes in APD from control. Symbols represent experimental values.

**Figure S6.** Simulated effects of 50% (light grey) and 100% (dark grey) block of  $I_{K1}$  on APD in PF, Endo, M and Epi cell models. Black bars indicate control values. A: APD at (i) 500 ms, (ii) 1000 ms, (iii) 2000 ms basic cycle length. B: absolute changes in APD from control due to the block. C: percentage changes in APD from control. Note that there is no data for 100% block in PF cells, as such a block results in sustained depolarisation.

**Figure S7.** Simulations of Class III drug effects on PF and ventricular cells. A: effects of 100% block of  $I_{Kr}$ ; B: effects of 100% block of  $I_{Ks}$ . Simulation results for PF (i), Endo (ii), M (iii) and Epi (iv) cell models are in good agreement with experimental data [33].

**Figure S8.** Simulations of  $\alpha$ 1-adrenergic agonist effects on PF and ventricular cell models. APs in all three ventricular cell types became shorter (primarily, in the M cell), but are substantially prolonged the PF cell, as seen in experiments [43].

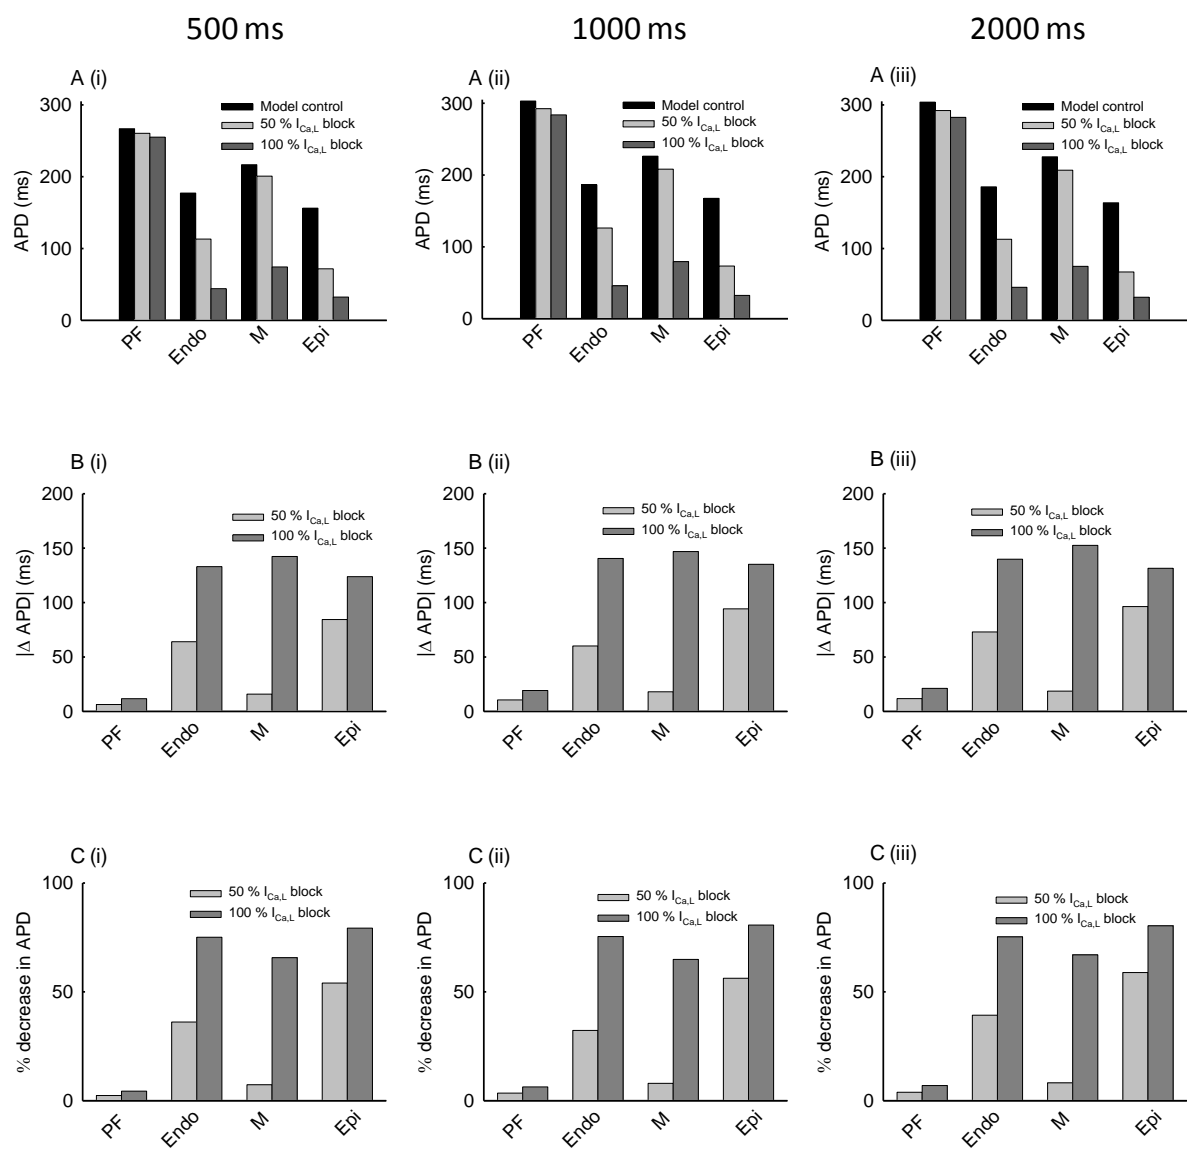

**Figure S1**

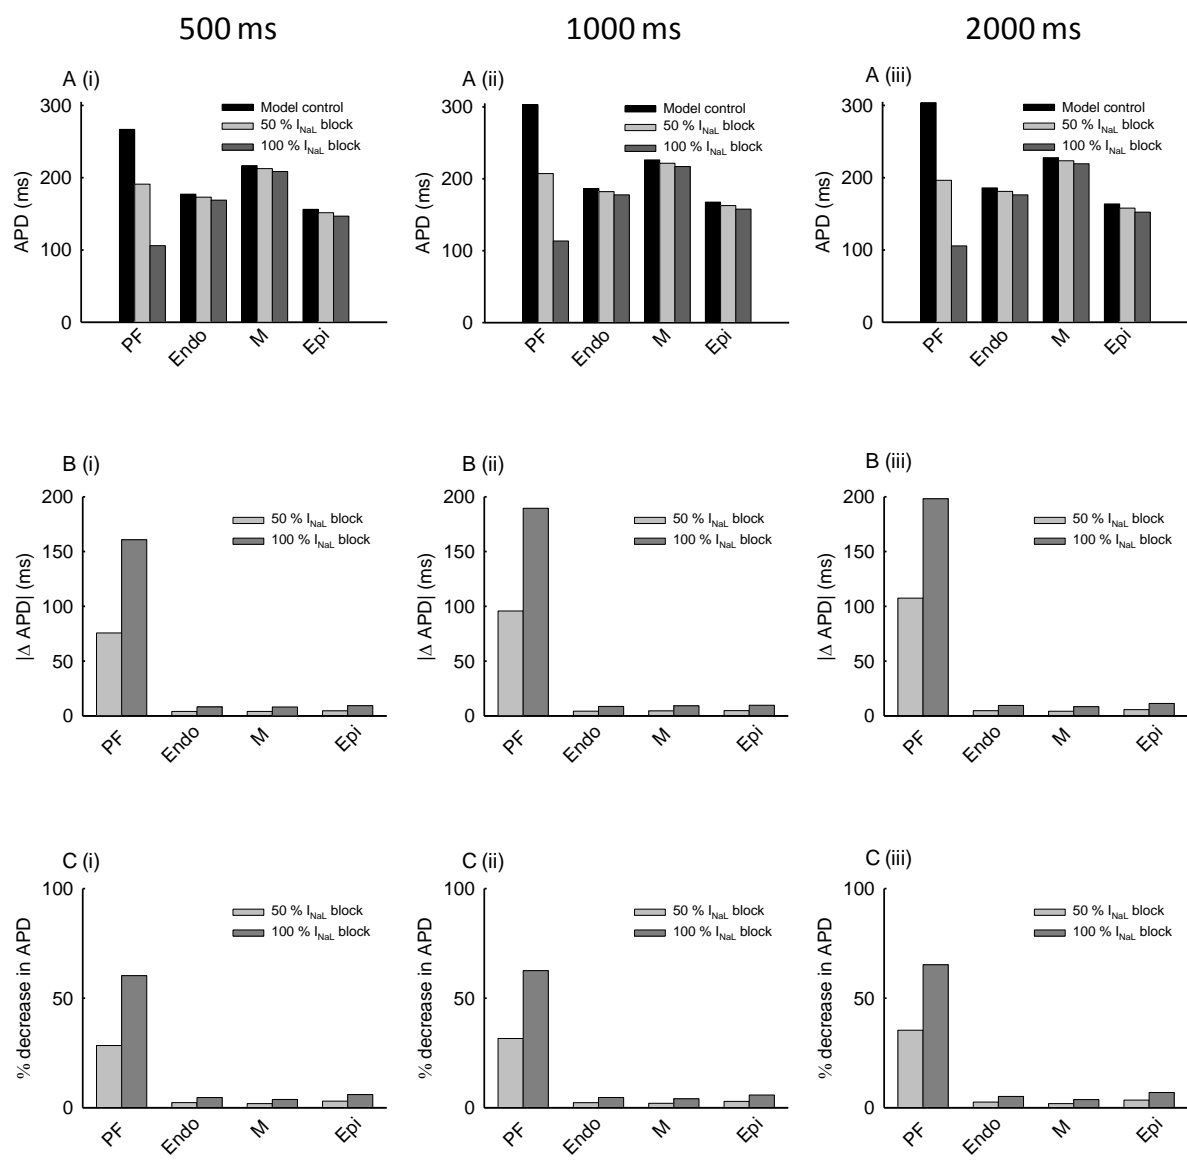

**Figure S2**

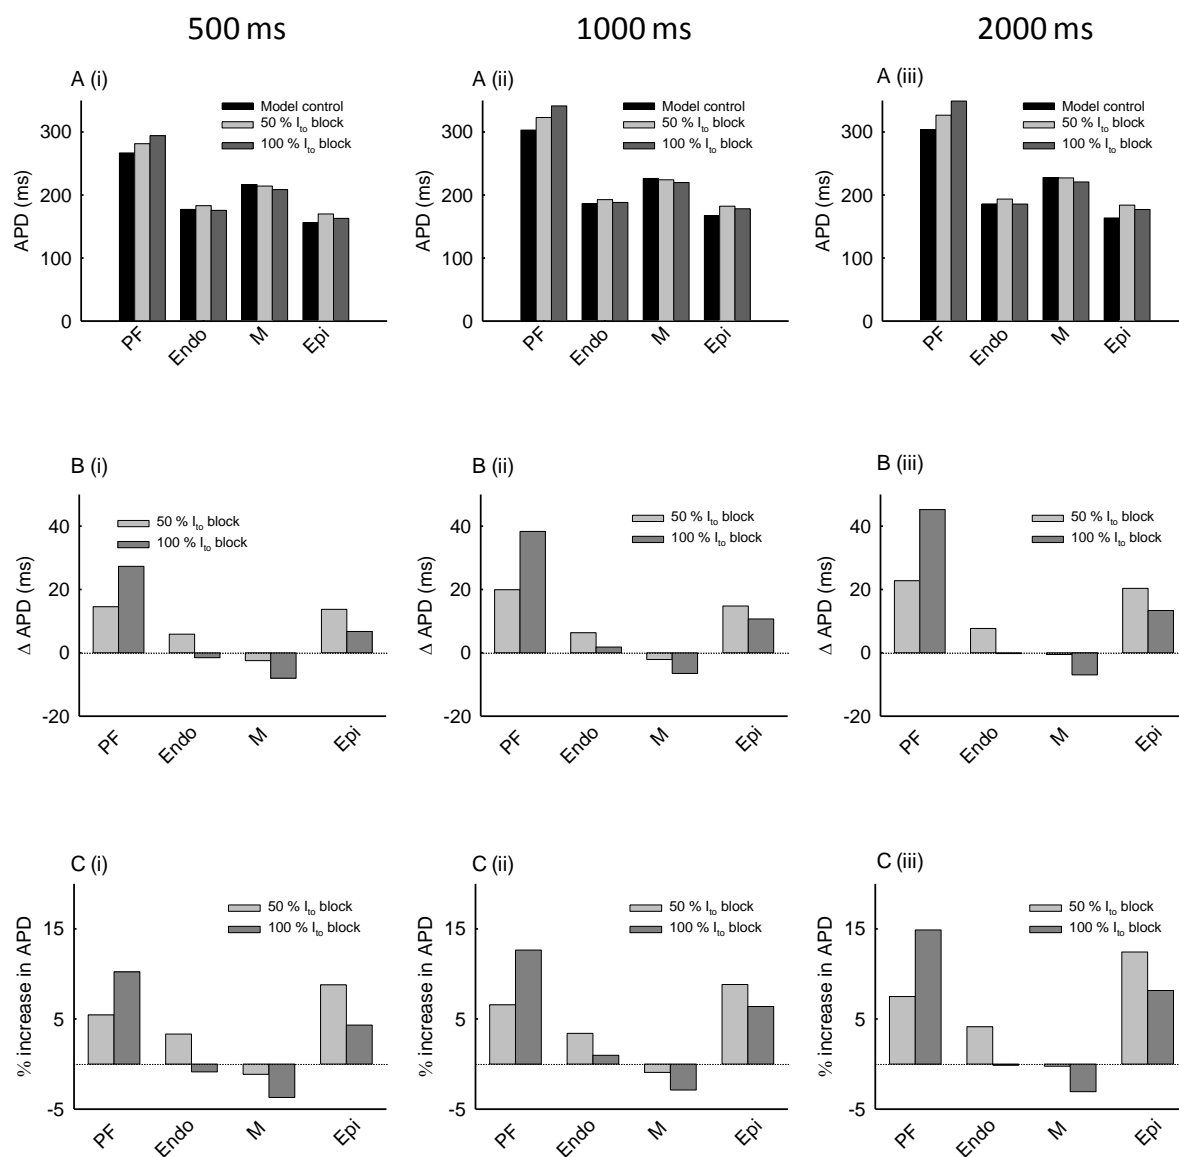

**Figure S3**

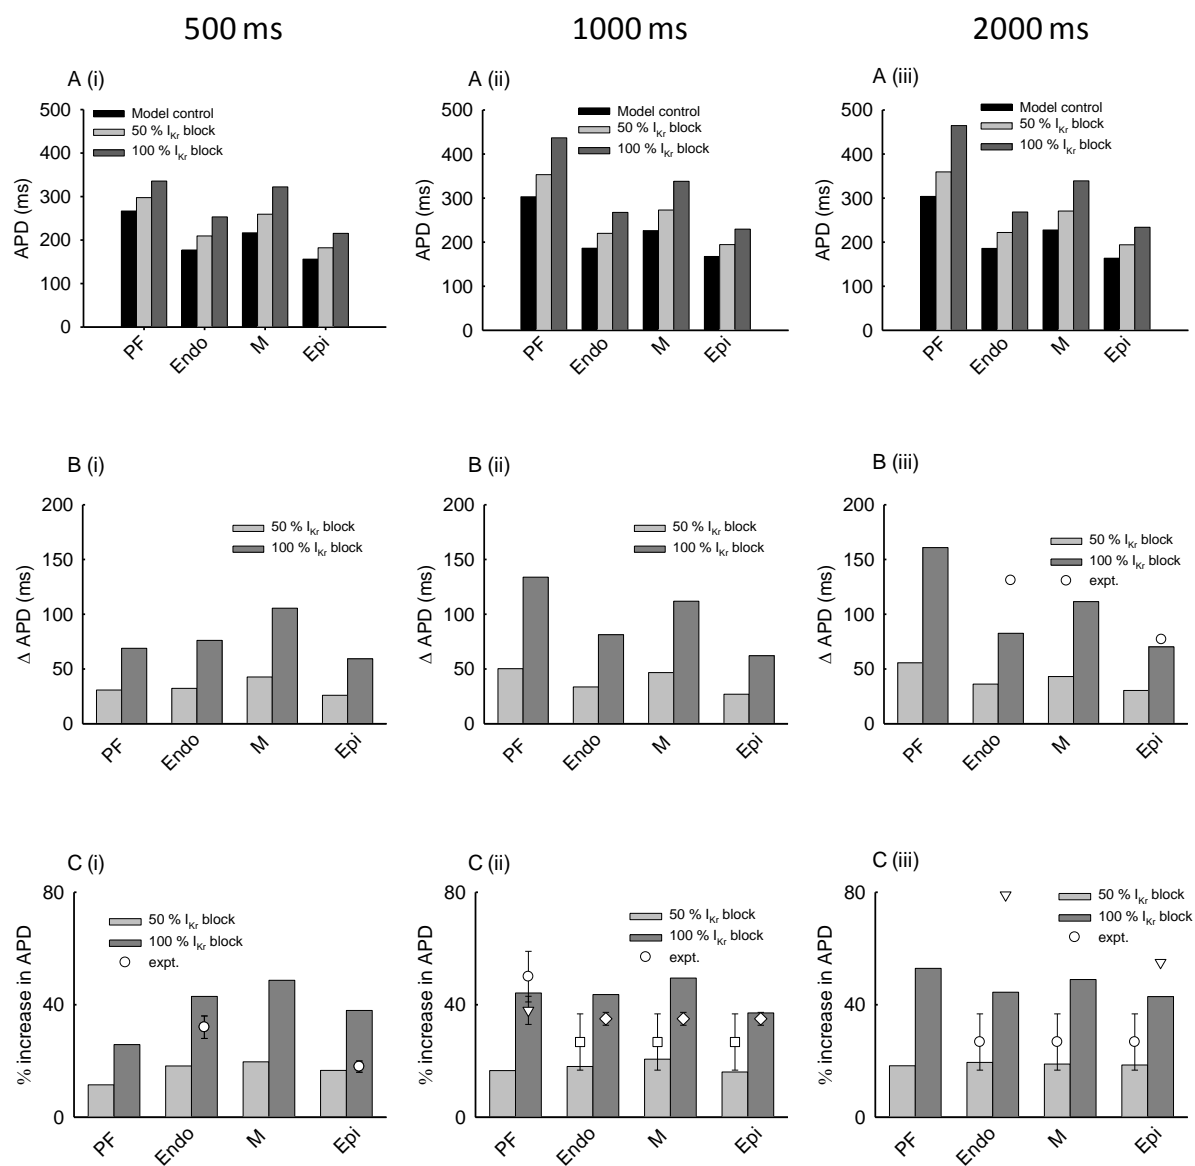

**Figure S4**

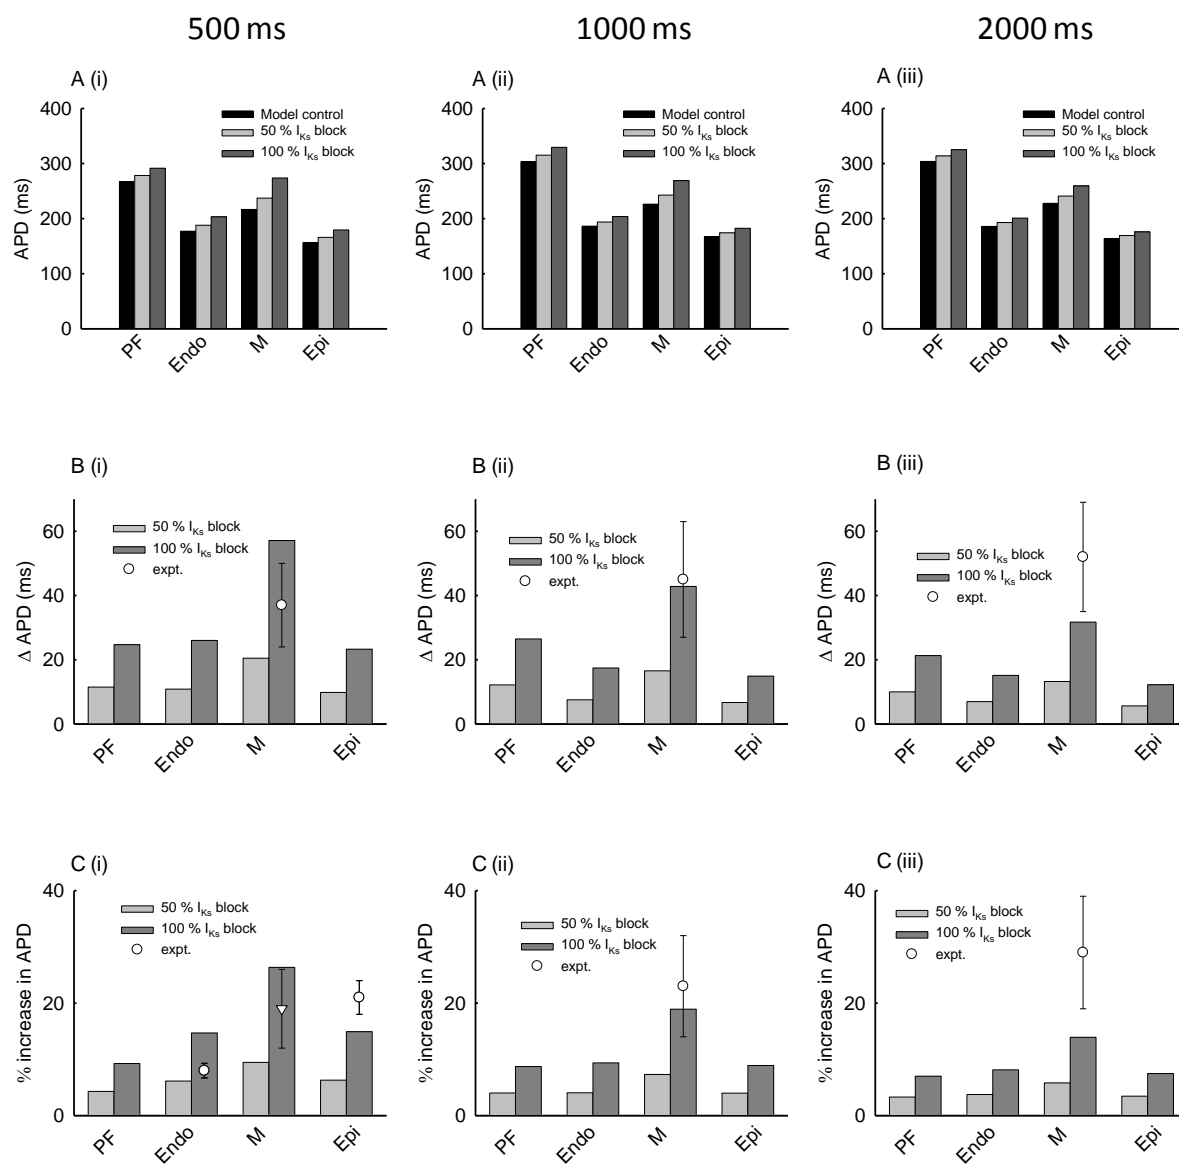

**Figure S5**



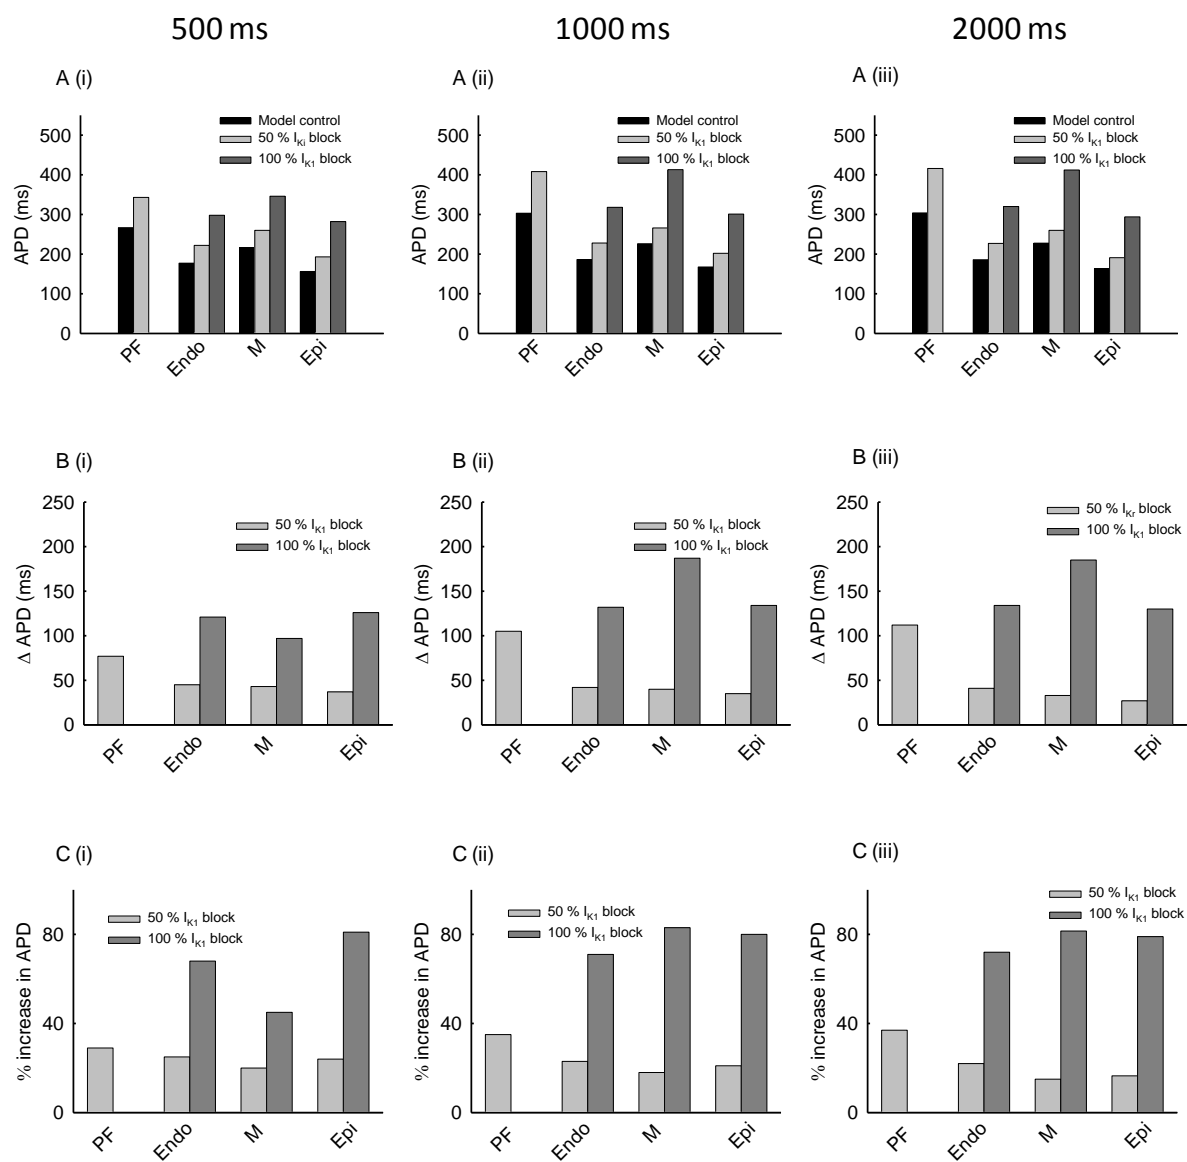

**Figure S6**

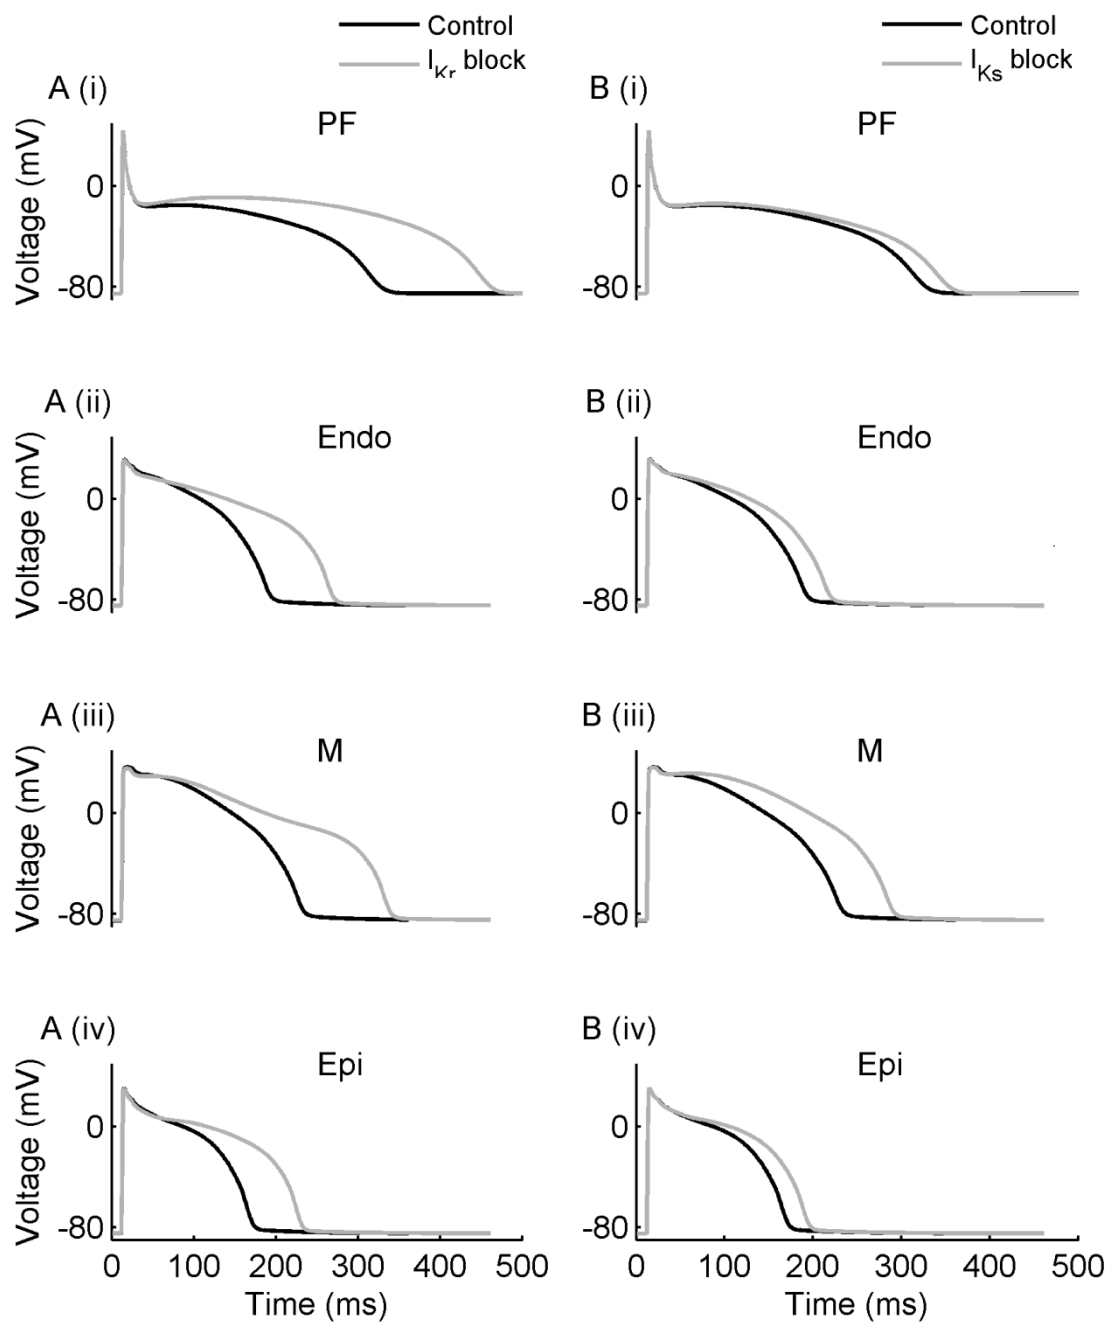

**Figure S7**

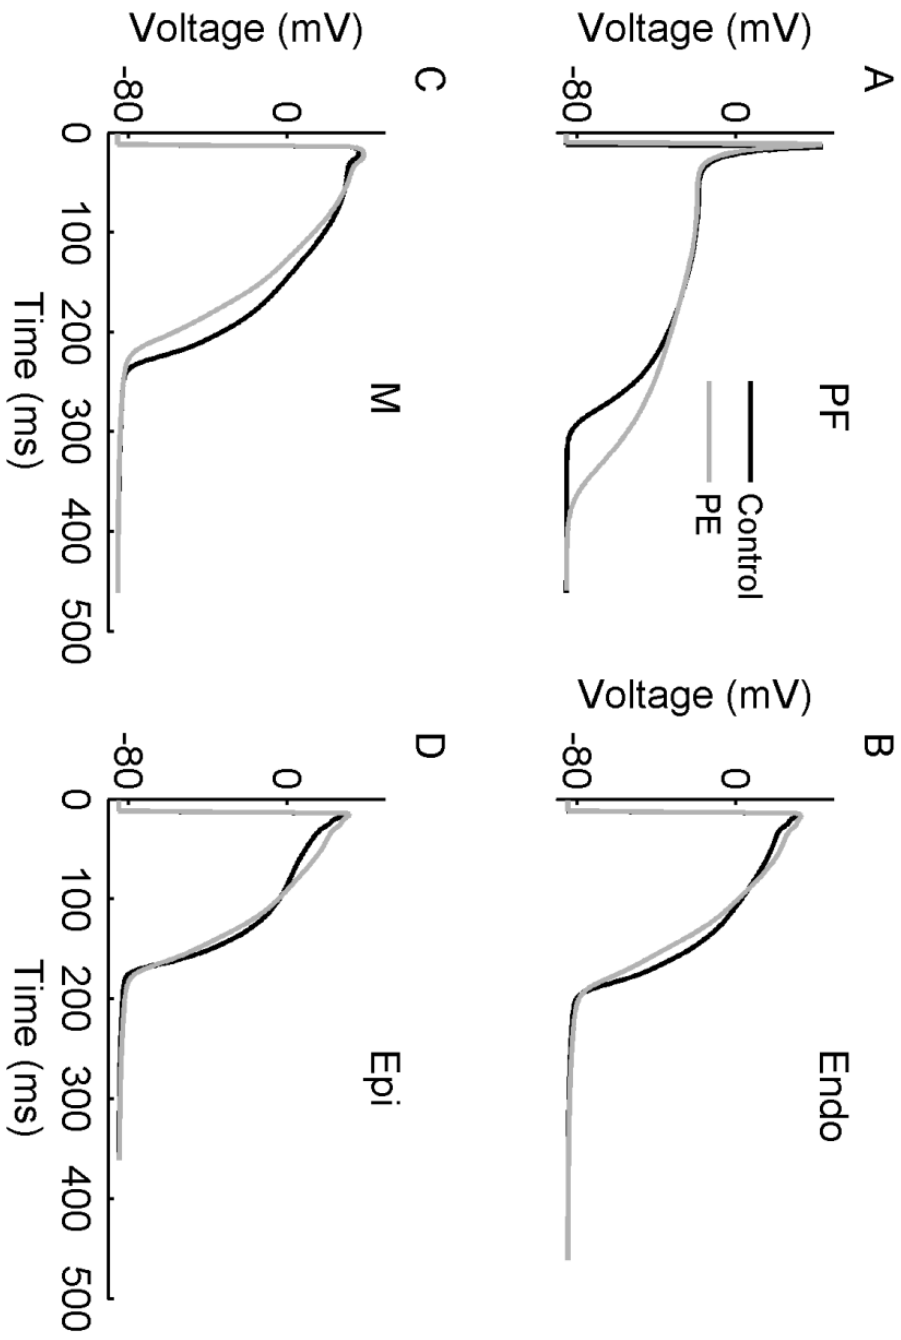

Figure S8
